# Supplementary material for: Phylogeny, structural evolution and functional diversification of the plant PHOSPHATE1 gene family: a focus on Glycine max
Source: PubMed Central journal article supplement (PMC3680083; doi:10.1186/1471-2148-13-103), 2013-05-24
Supplement: 1471-2148-13-103-S9.pdf [file 1471-2148-13-103-S9.pdf]

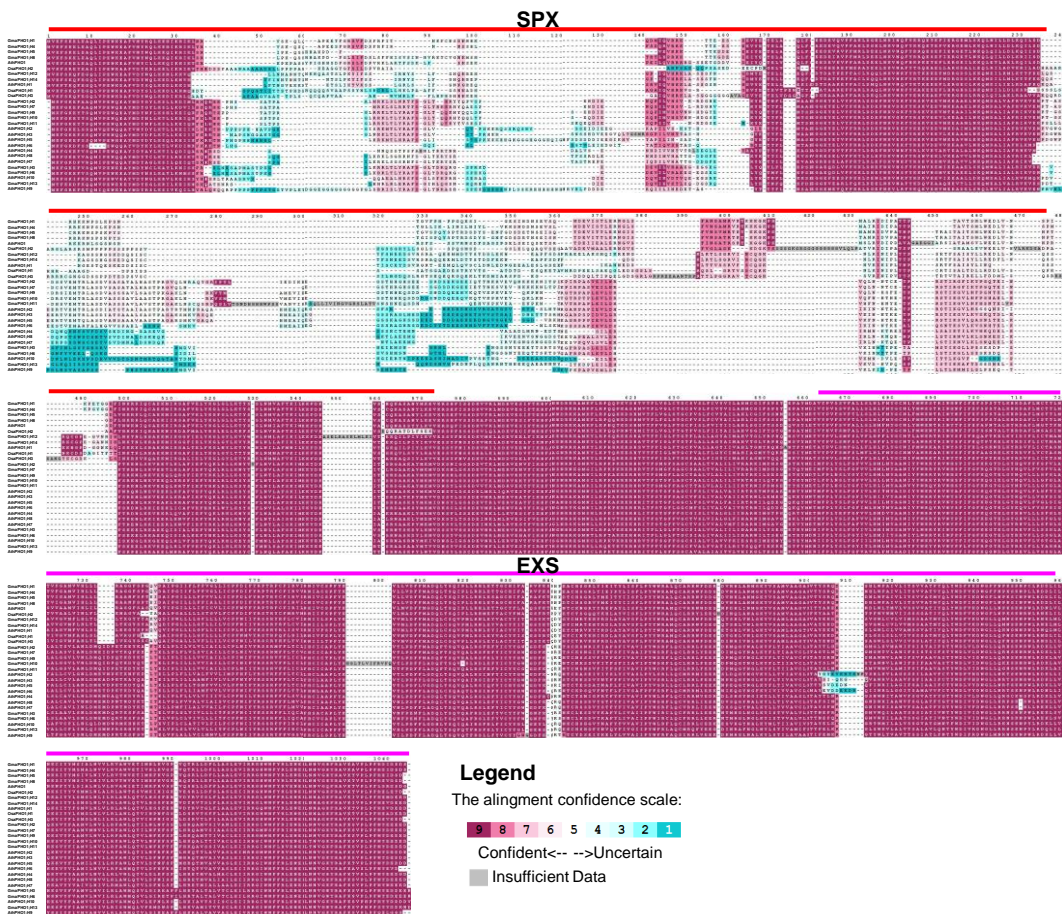

**Figure S4. Multiple sequence alignment of PHO1 proteins in soybean, *Arabidopsis* and rice.**
